# Supplementary material for: Phosphine/palladium-catalyzed one-pot synthesis of functionalized 6H-benzo[c]chromenes
Source: Royal Society of Chemistry journal article supplement (doi:10.1039/c5ra10550a), 2015-01-01

## Supporting Information

### Phosphine/Palladium-Catalyzed One-Pot Synthesis of functionalized

#### 6*H*-benzo[*c*]chromenes

Hanjie Mo <sup>a</sup>, Chengmin Pan <sup>a,b</sup>, Dingben Chen <sup>a</sup>, Di Chen <sup>a</sup>, Jianrong Gao <sup>b</sup>, Jianguo Yang <sup>a,\*</sup>

<sup>a</sup> School of Pharmaceutical and Chemical Engineering, Taizhou University, Taizhou 317000, P. R. China. E-mail: [yjg@tzc.edu.cn](mailto:yjg@tzc.edu.cn)

<sup>b</sup> College of Chemical Engineering and Materials Science, Zhejiang University of Technology, Hangzhou 310014, P. R. China.

## Supporting Information

### List of contents

|                                                    |     |
|----------------------------------------------------|-----|
| Graphics of reactions                              | S2  |
| <sup>1</sup> H NMR and <sup>13</sup> C NMR spectra | S2  |
| NOE spectrum of <b>4a</b>                          | S24 |

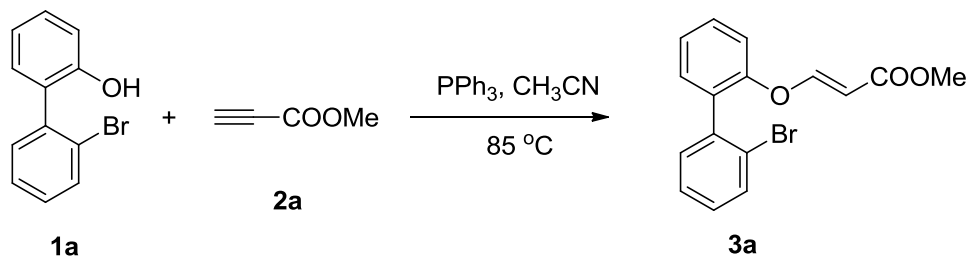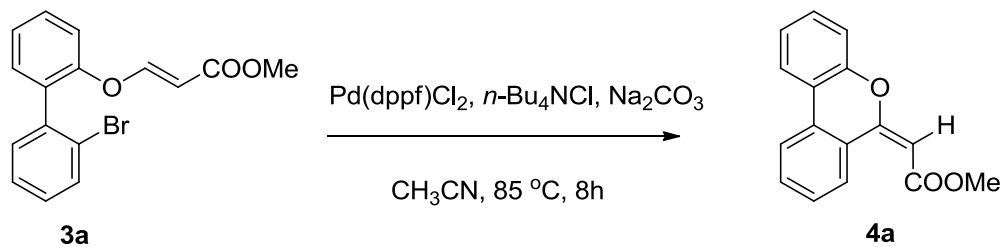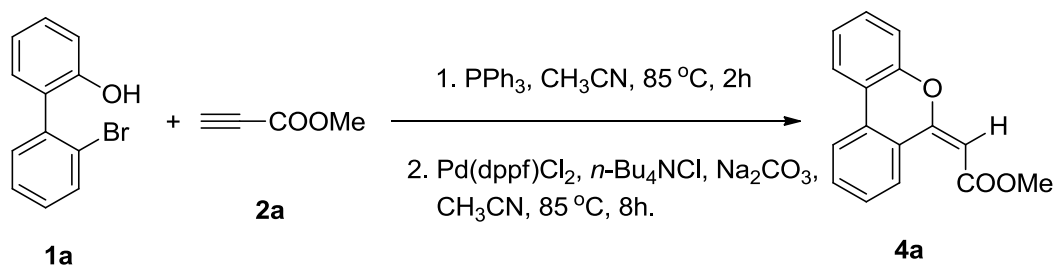

$^1\text{H}$  NMR and  $^{13}\text{C}$  NMR spectra.

**3a:**

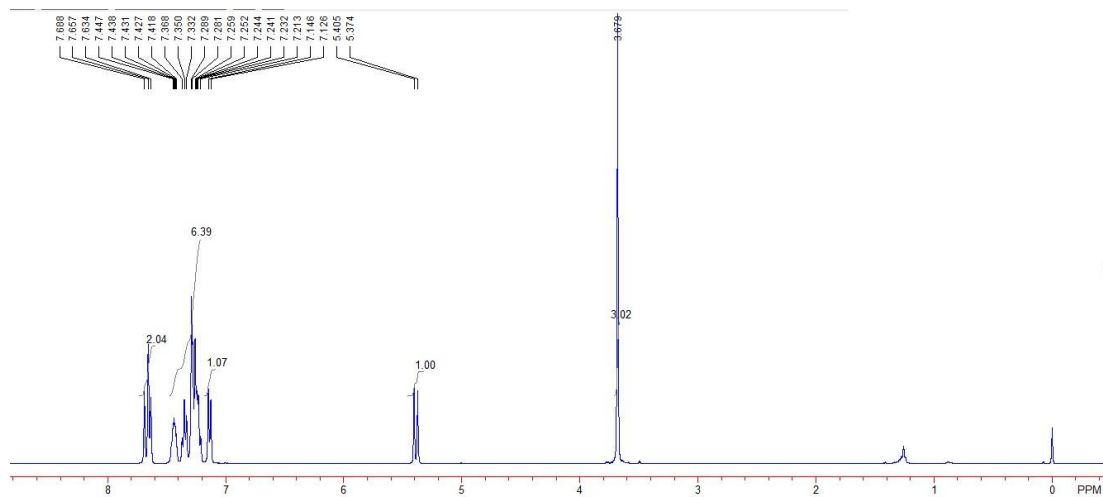

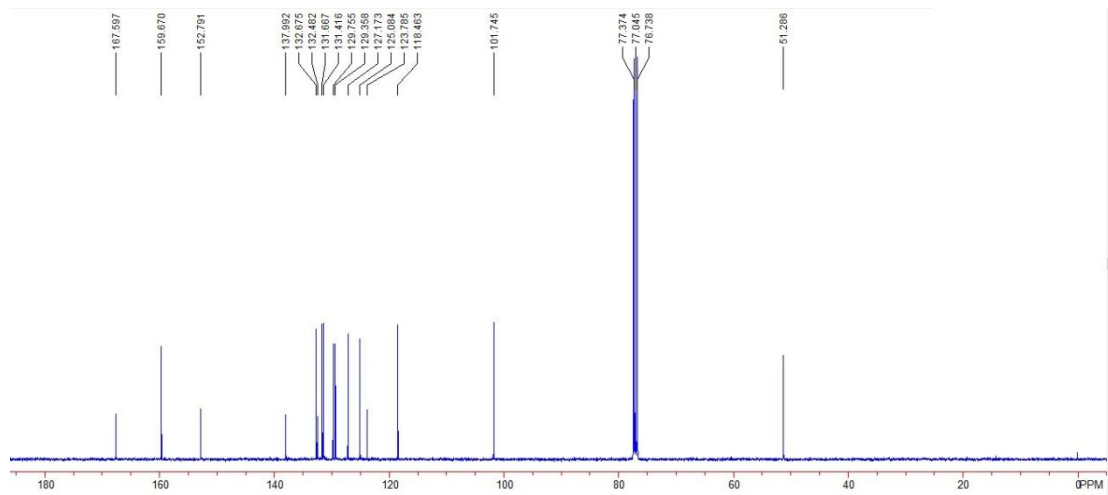

4a:

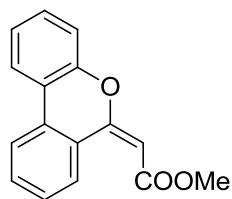

4a

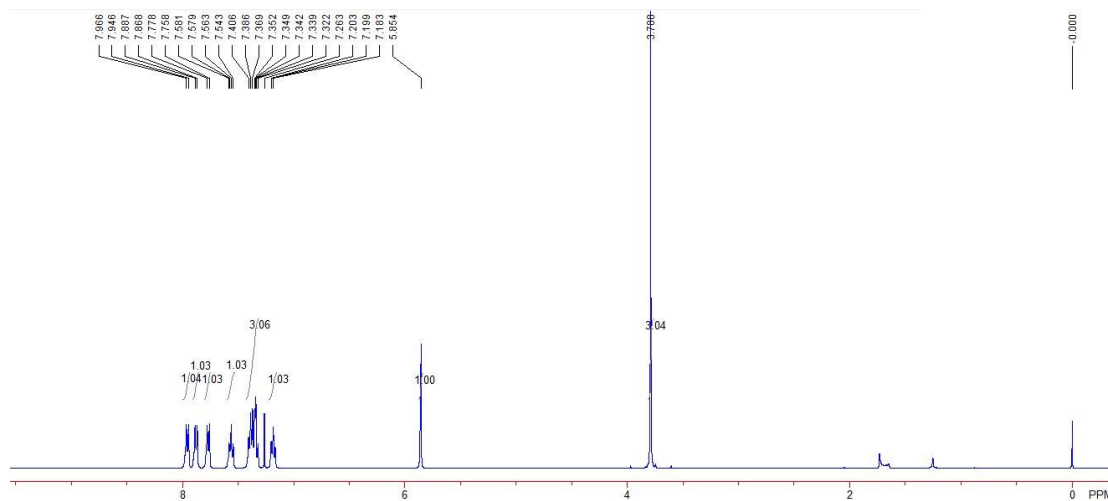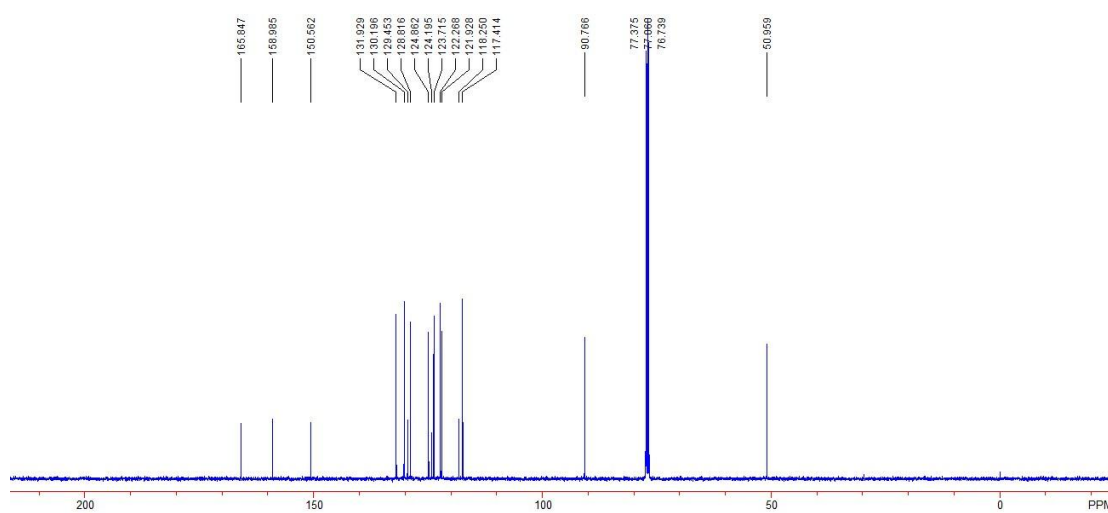

4b:

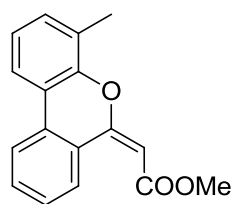

4b

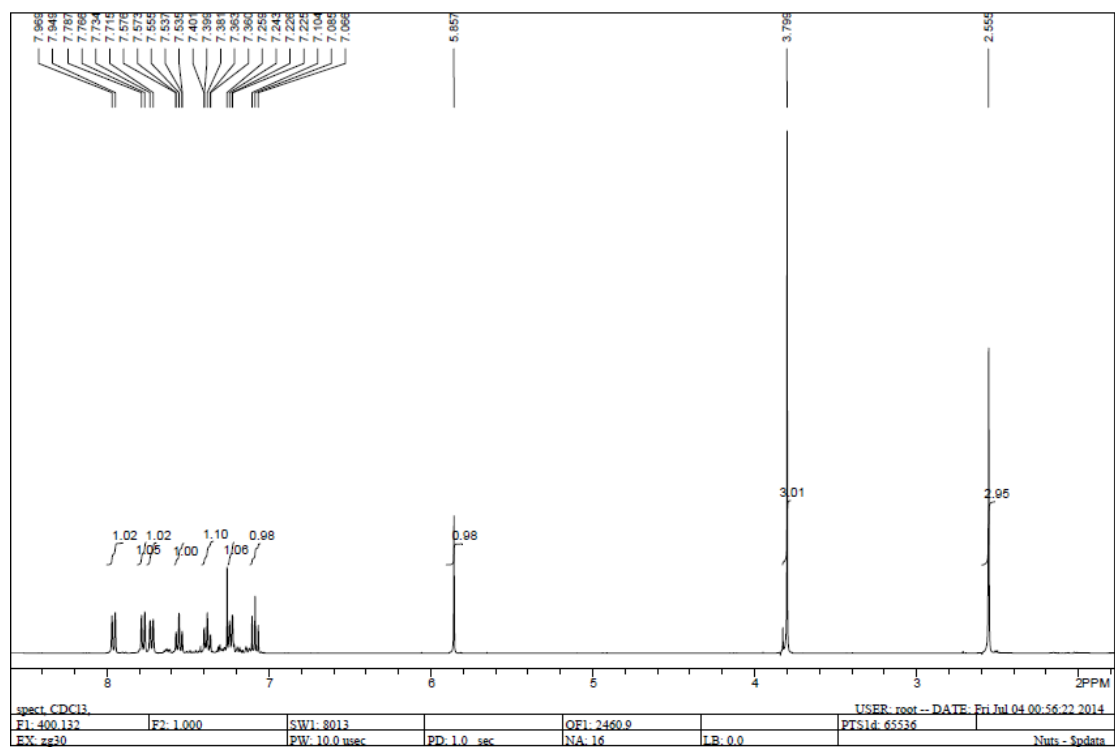

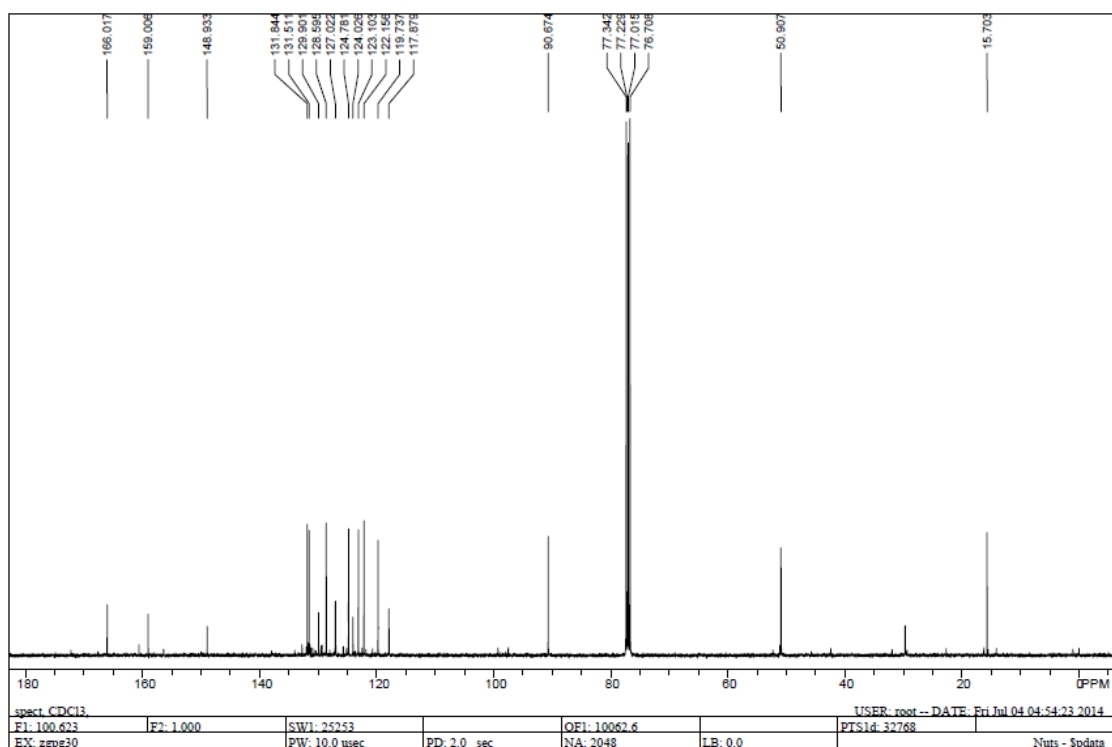

4c:

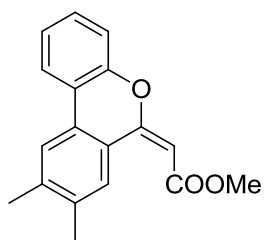

4c

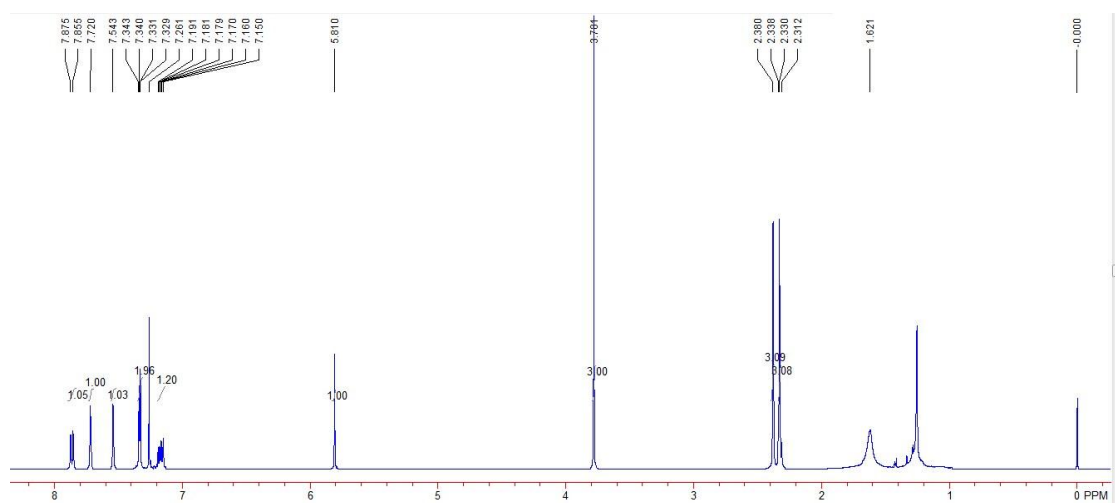

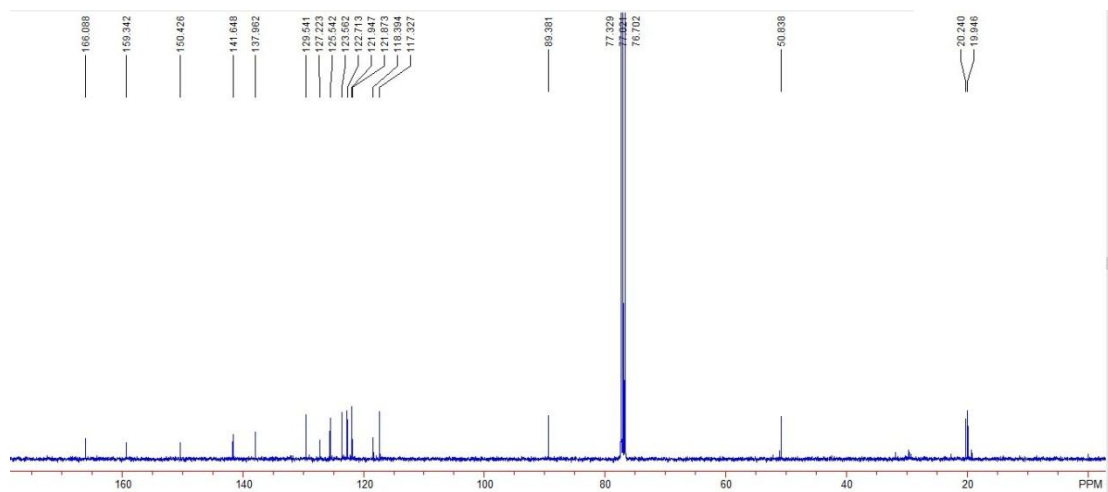

**4d:**

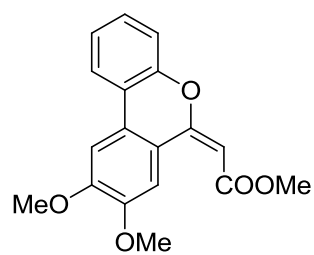

**4d**

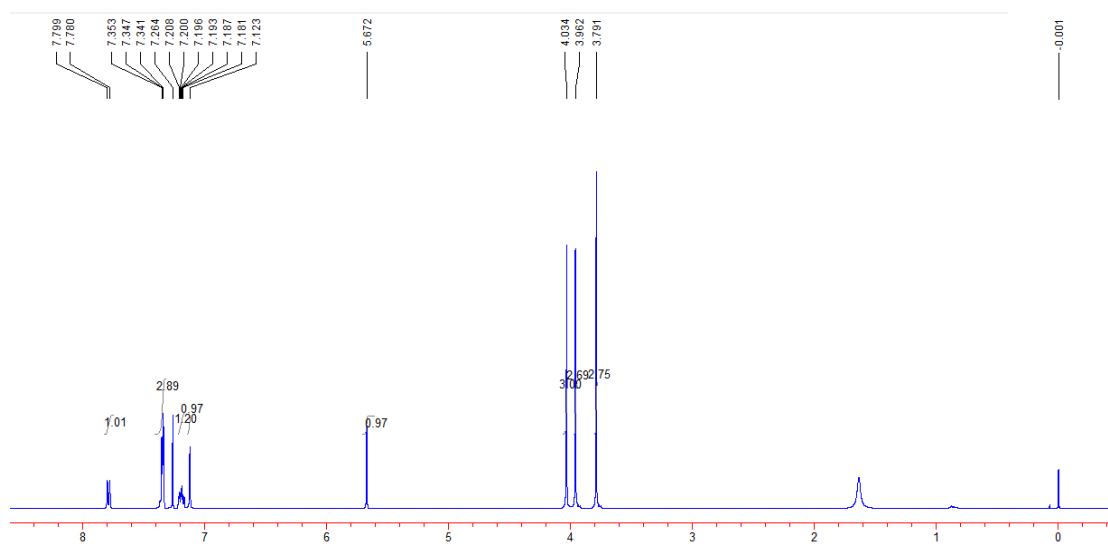

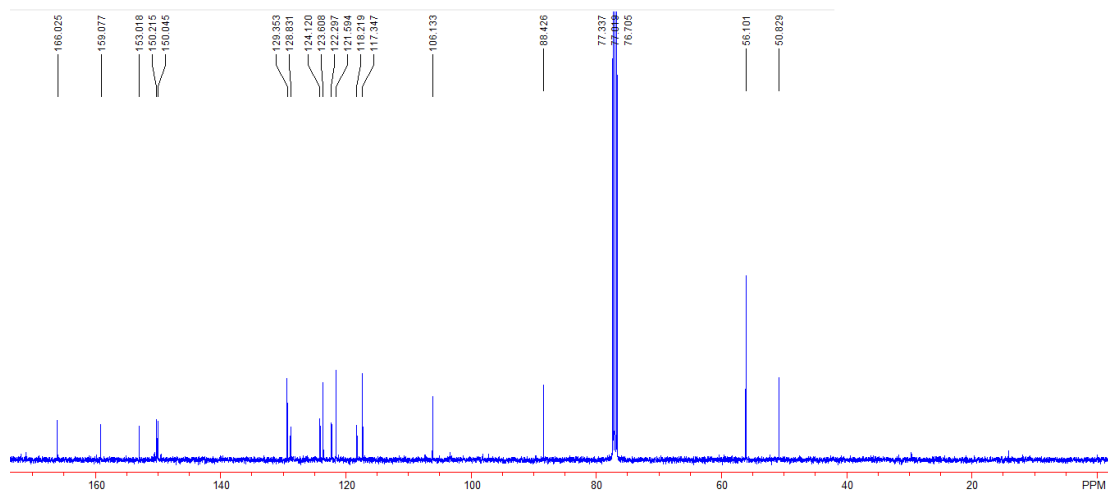

4e:

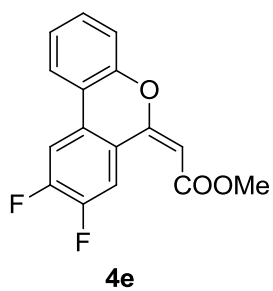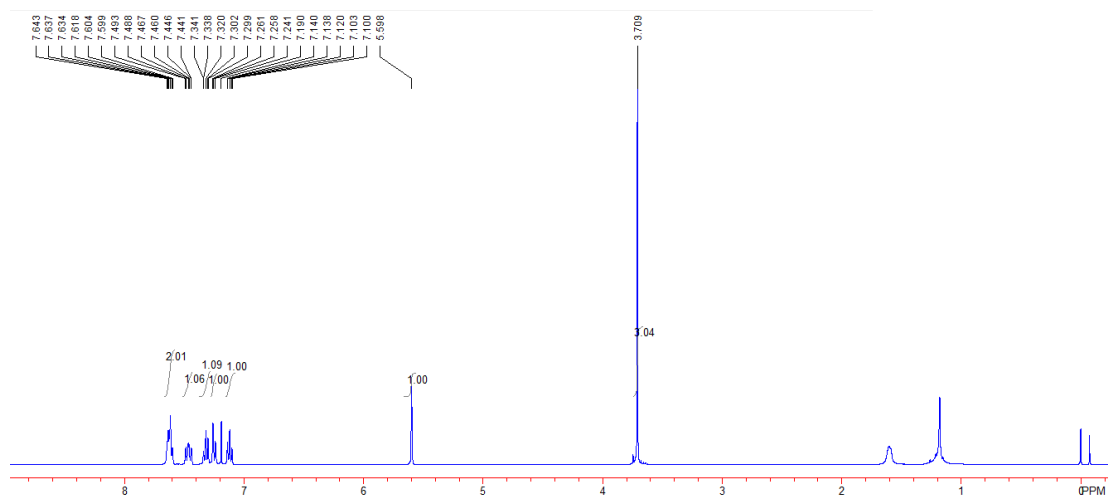

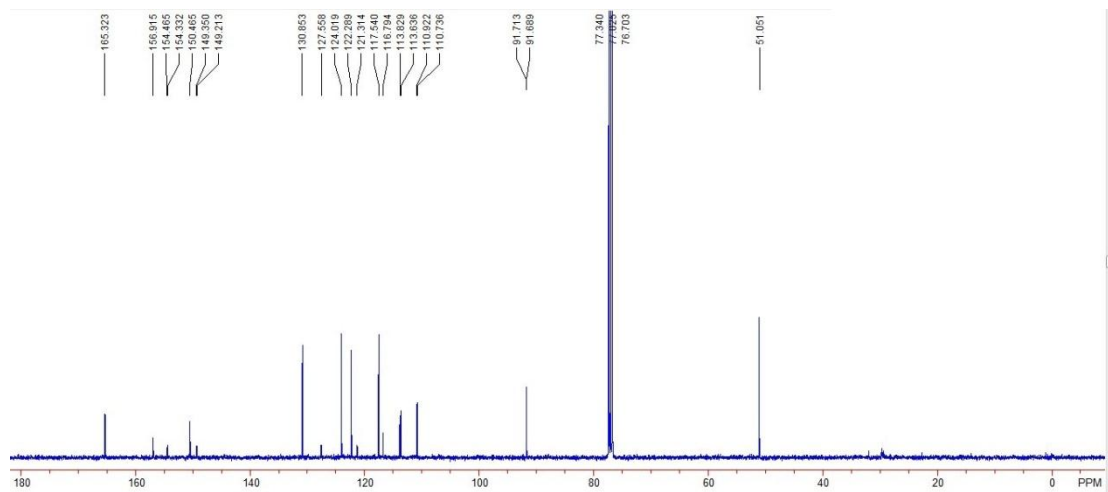

4f:

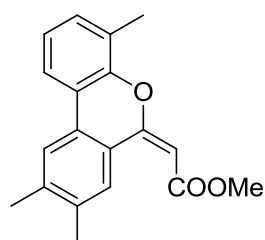

4f

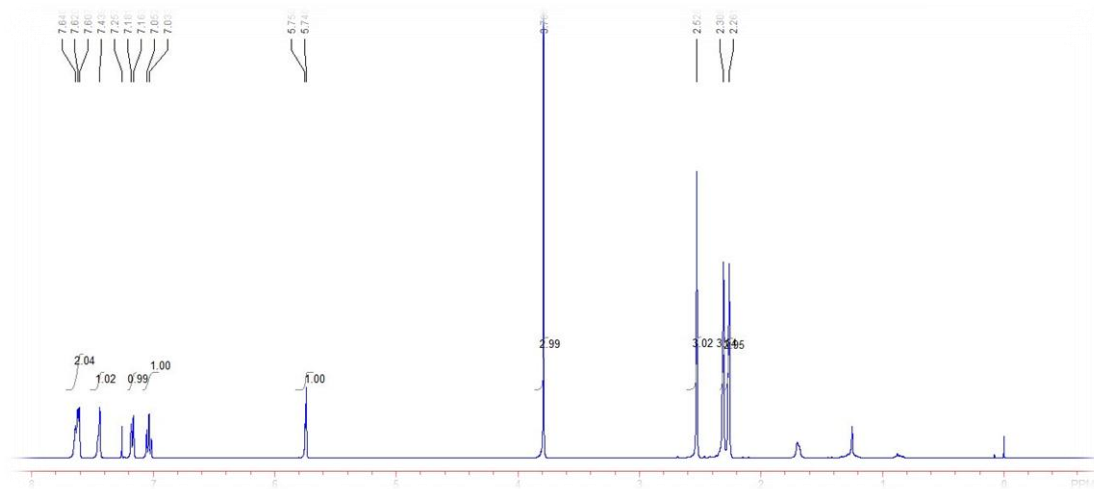



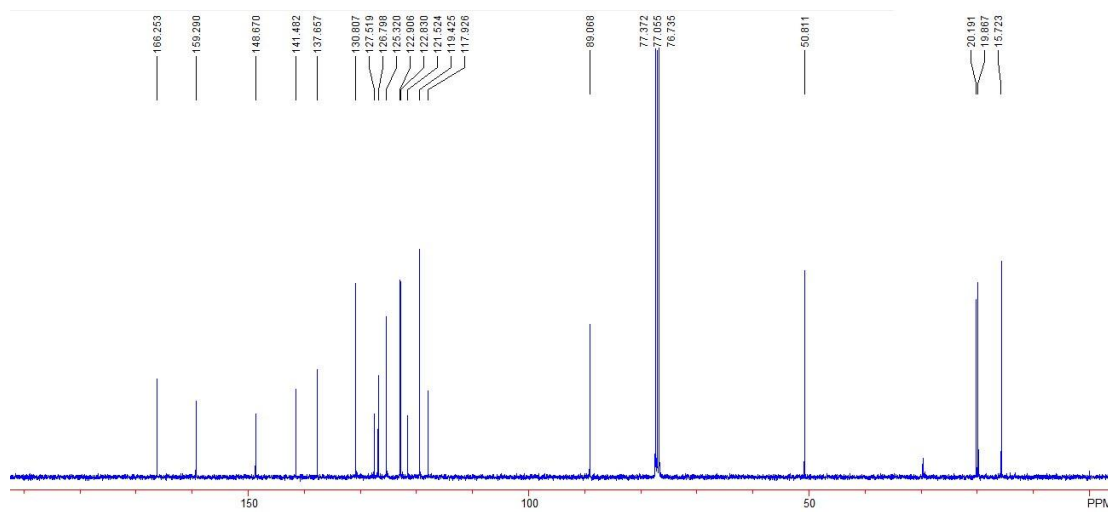

**4g:**

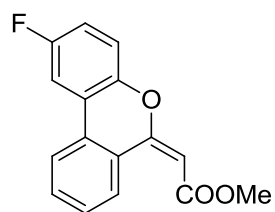

**4g**

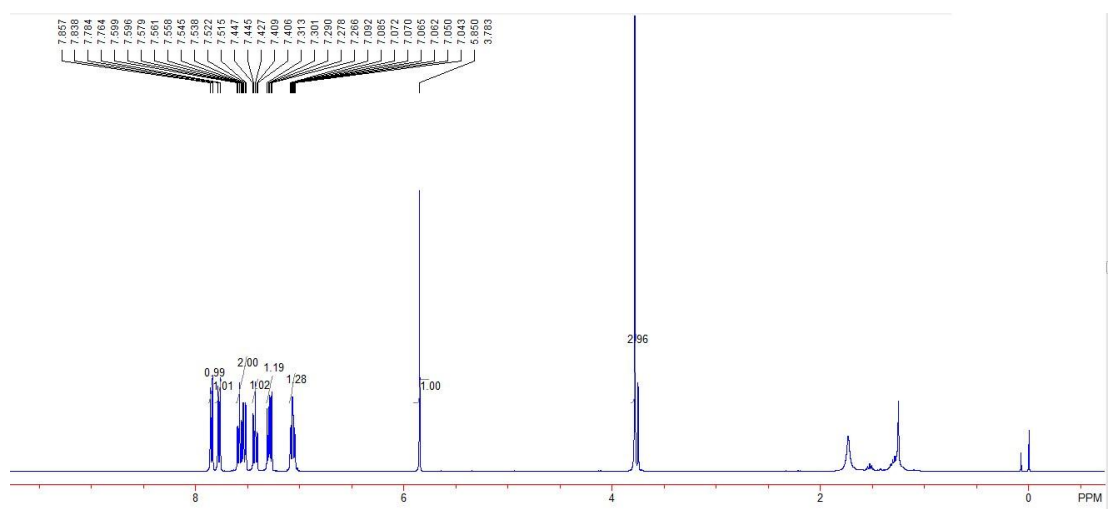

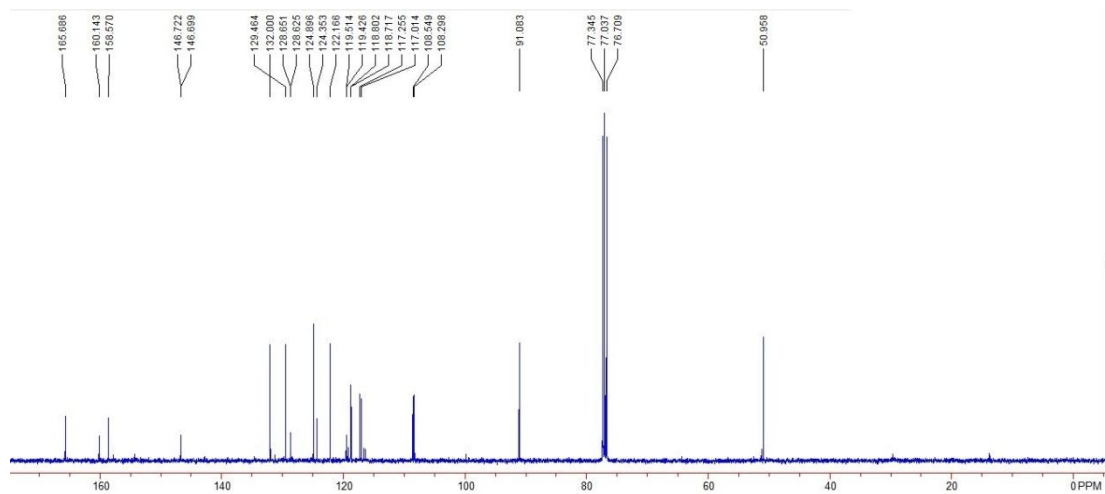

4h:

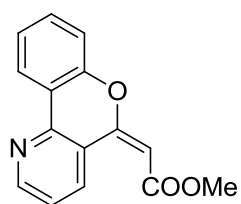

4h

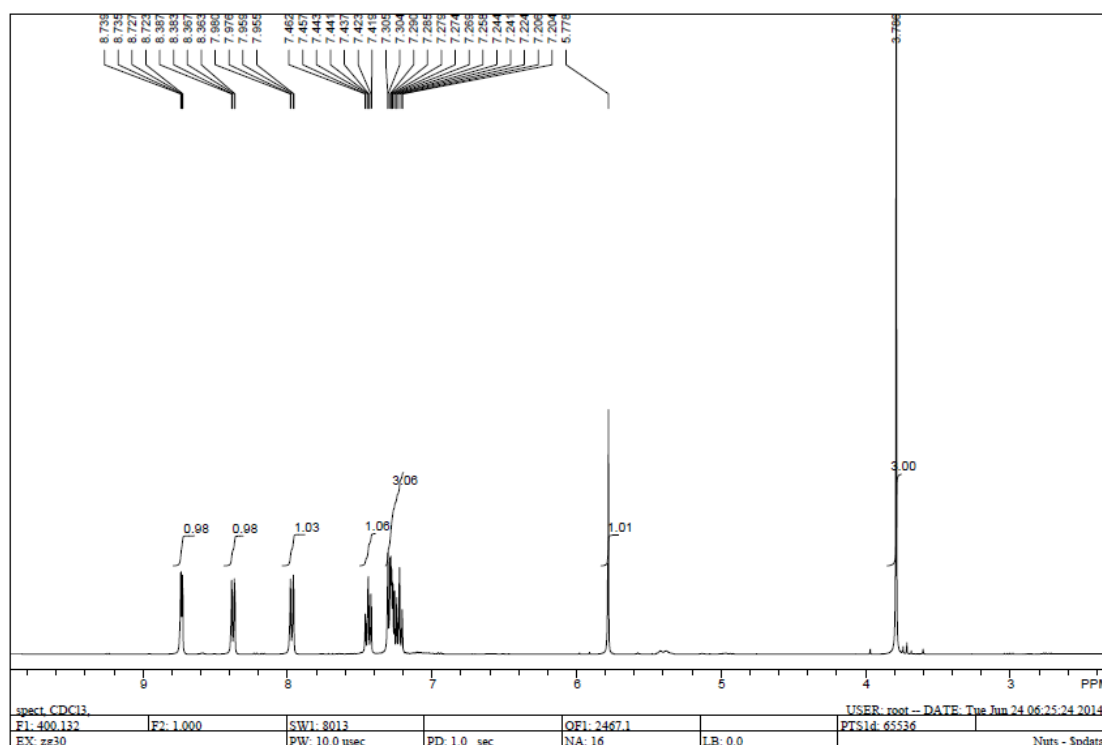

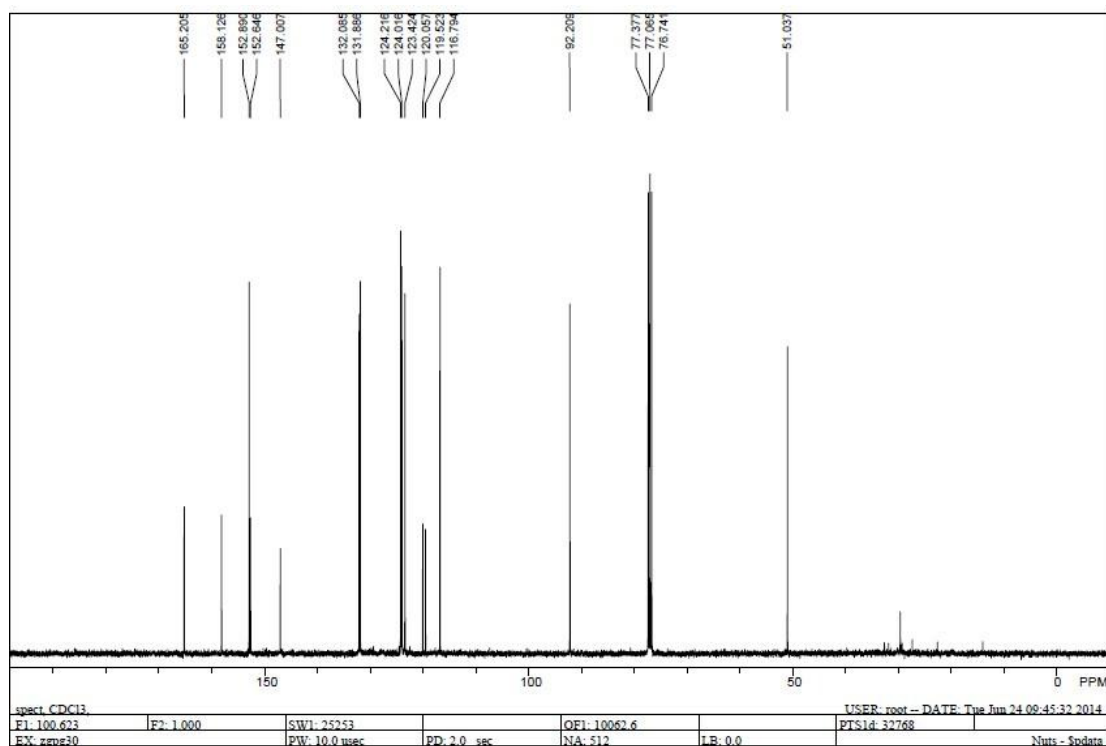

4i:

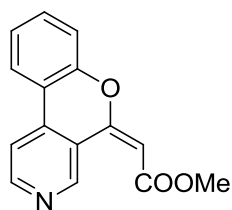

4i

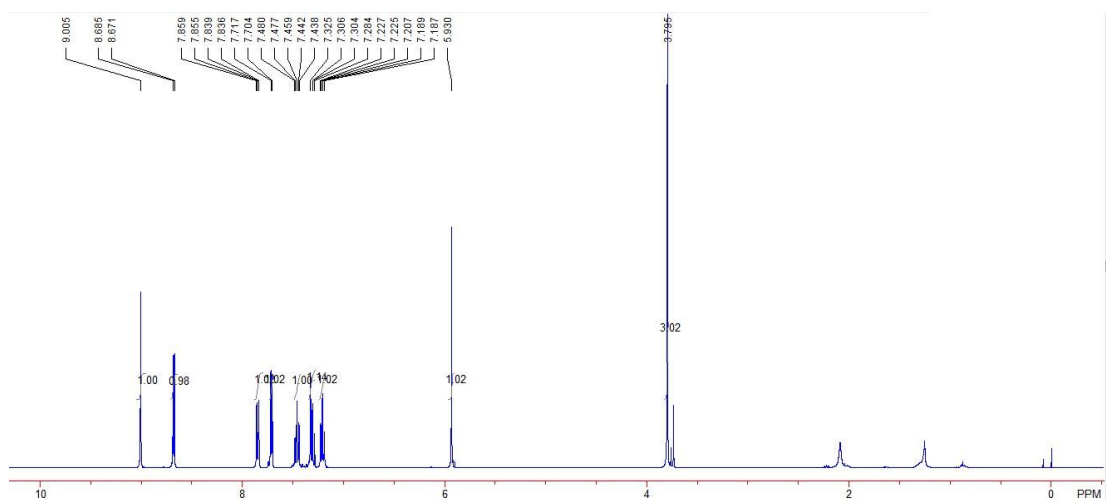

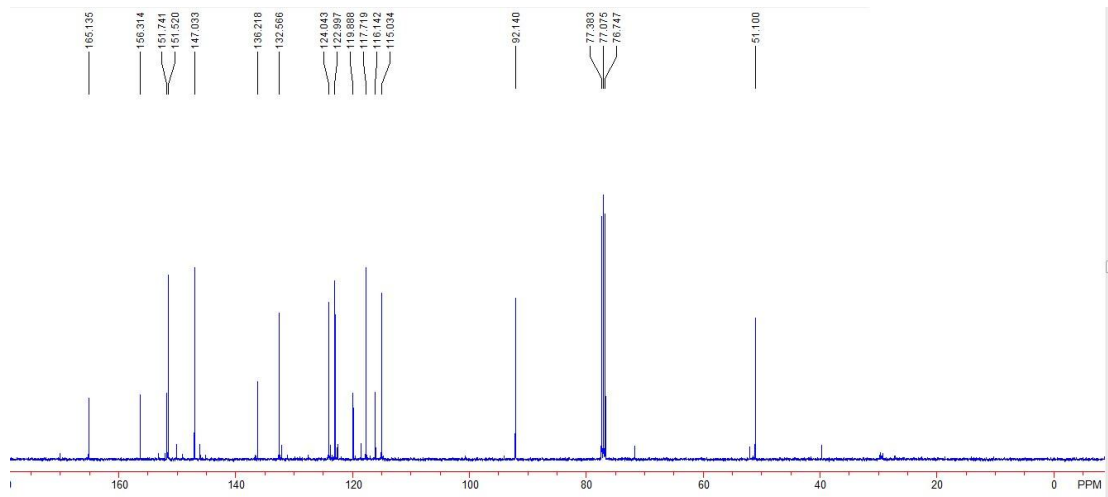

4j:

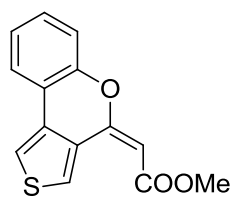

4j

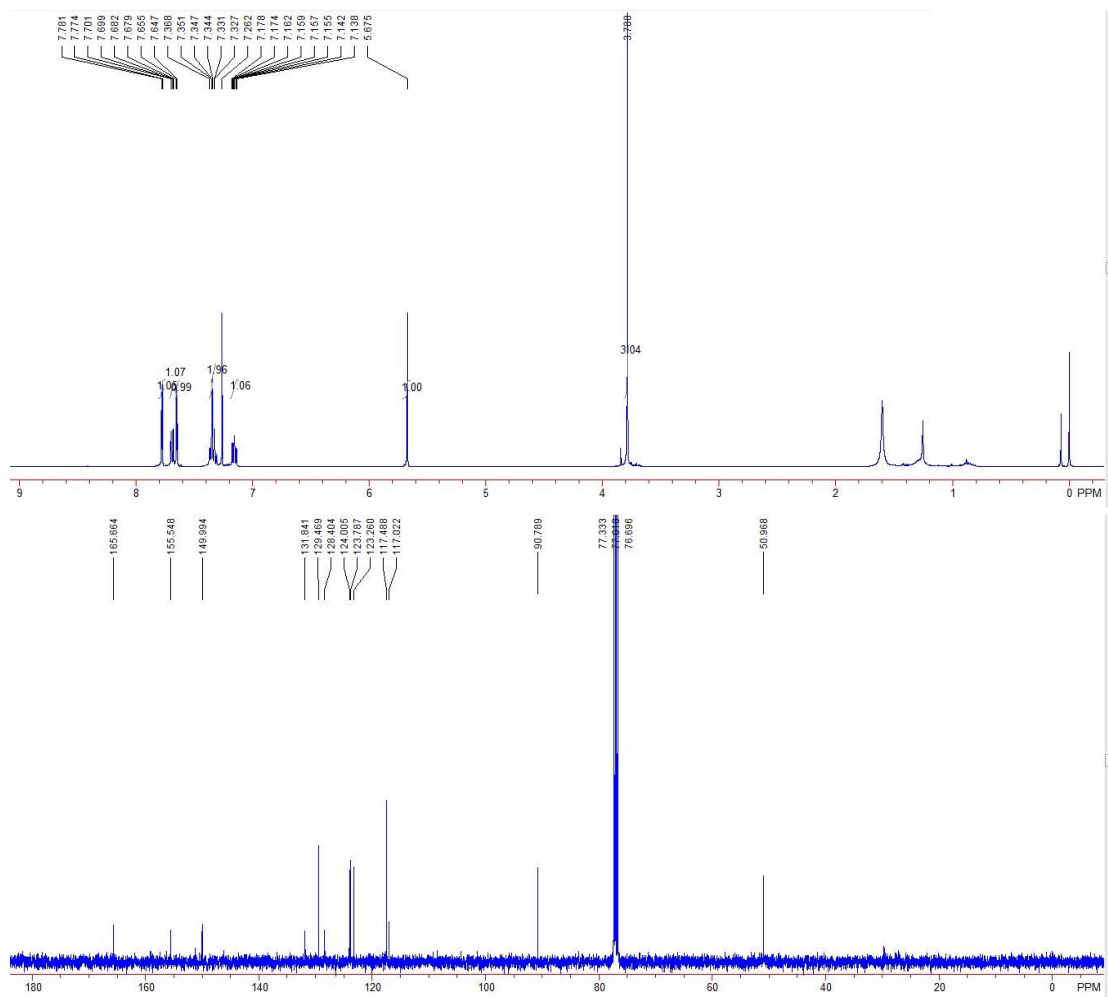

5a:

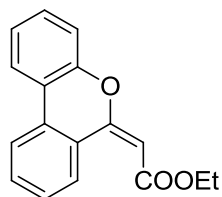

5a

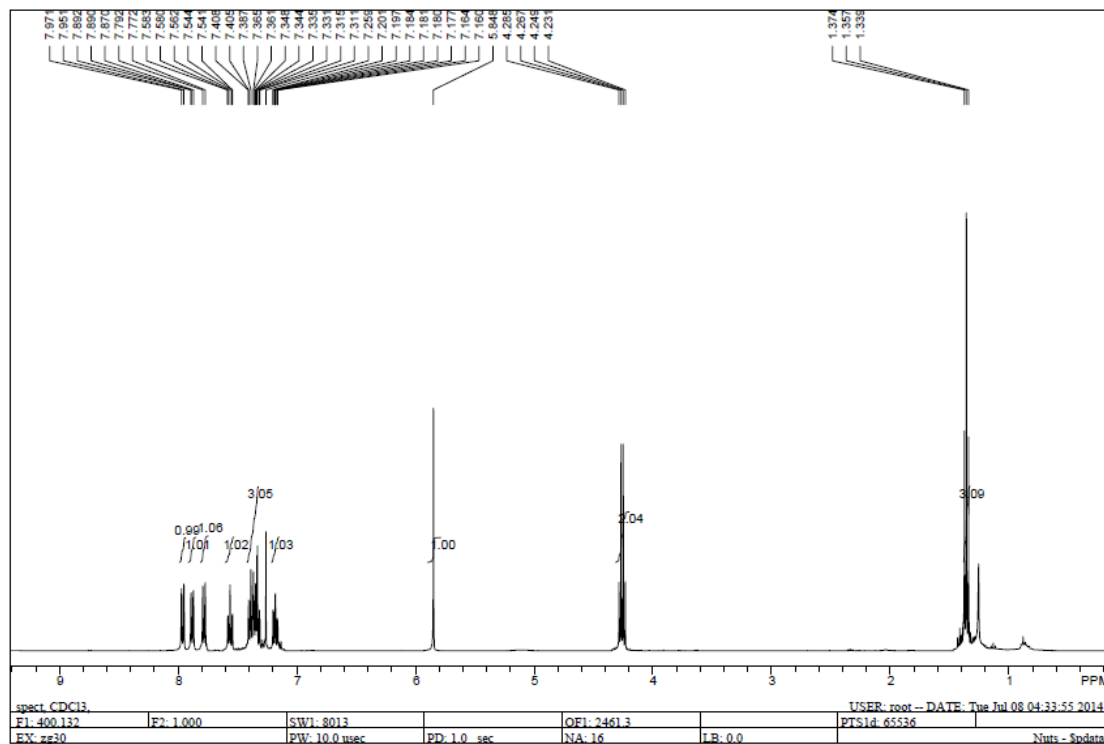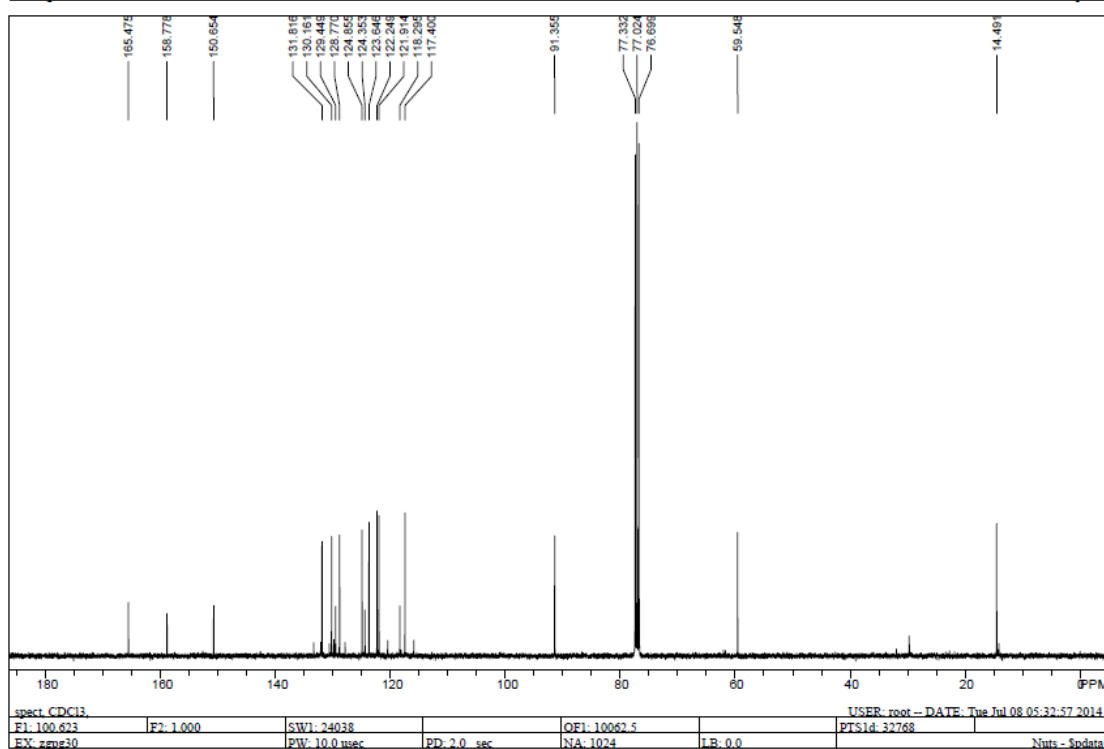

6a:



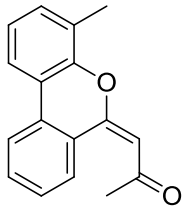

**6b**

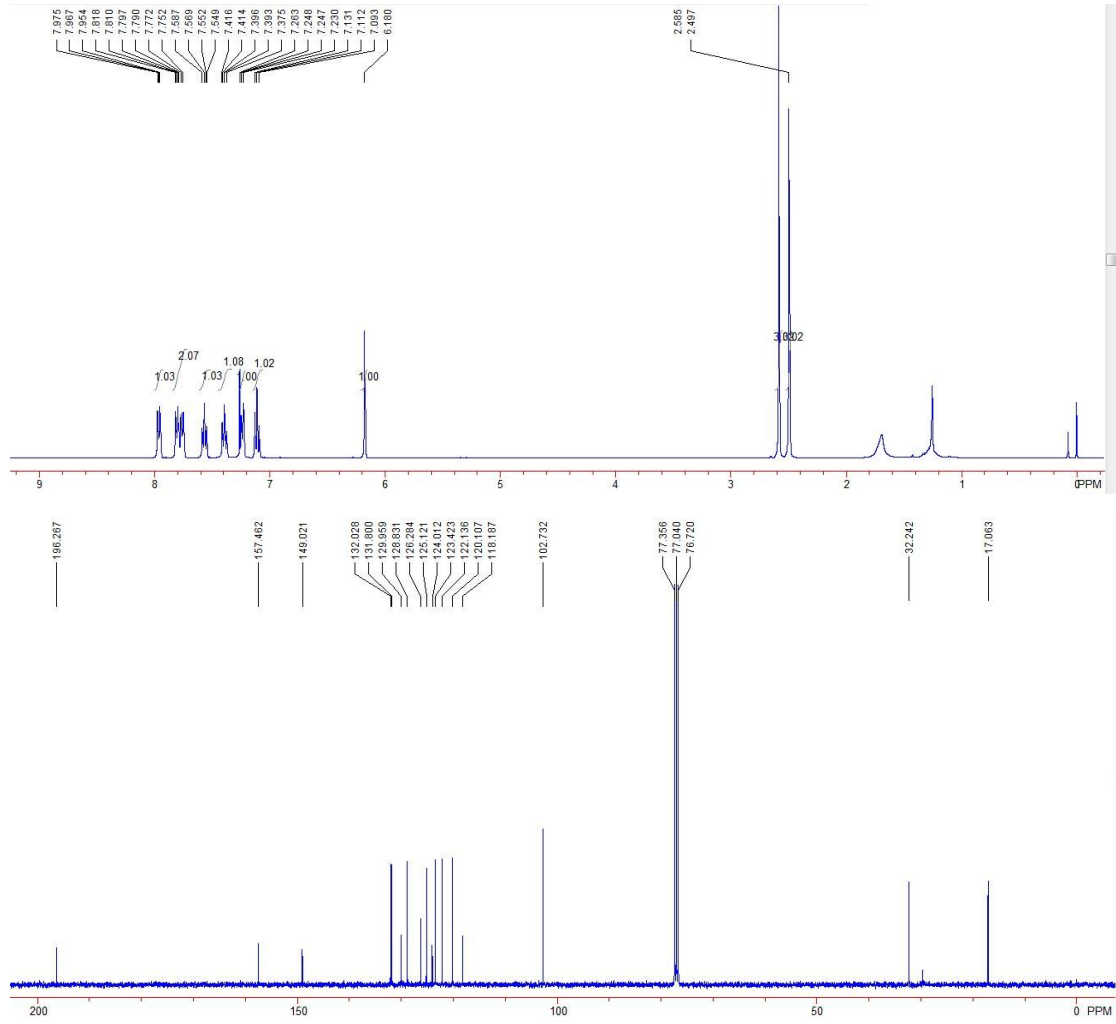

**6c:**

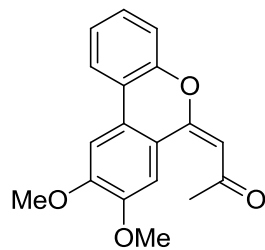

**6c**

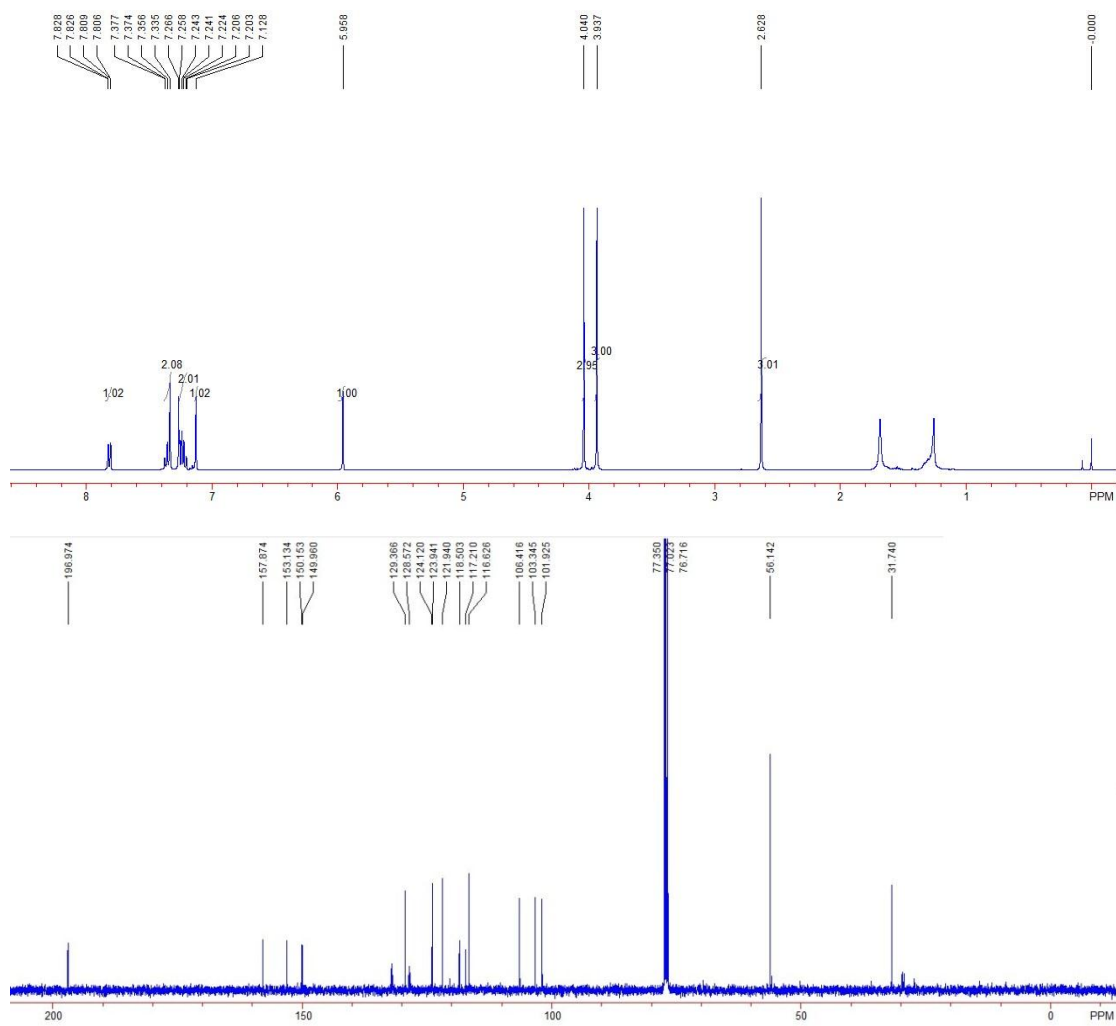

**6d:**

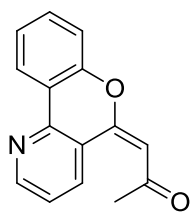

**6d**



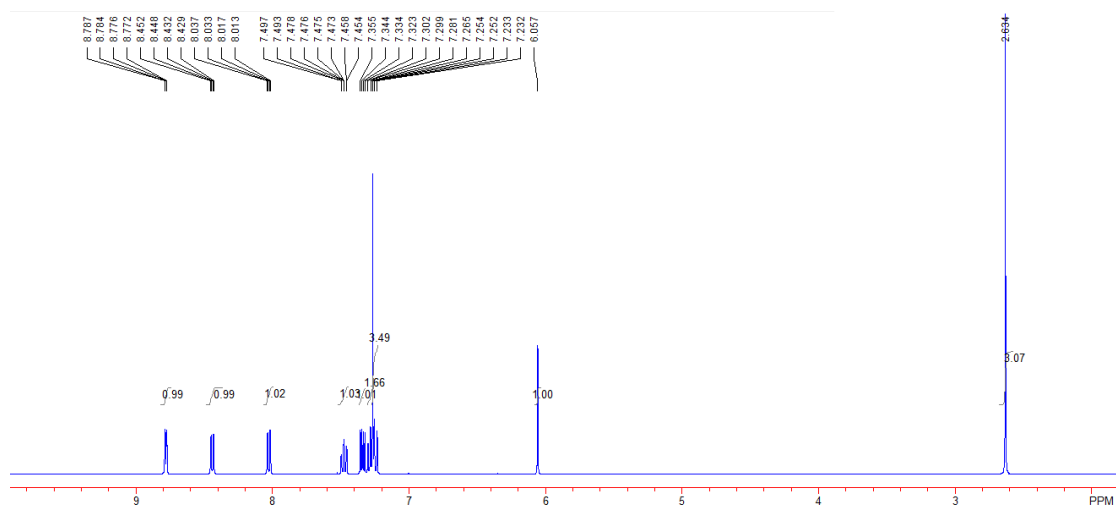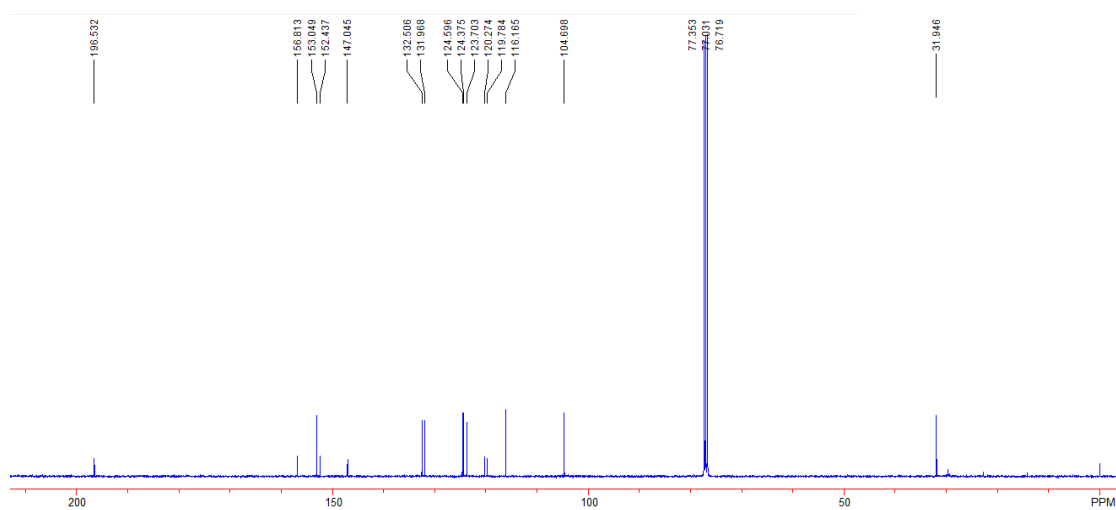

**7a:**

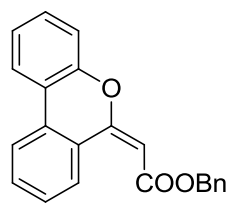

**7a**

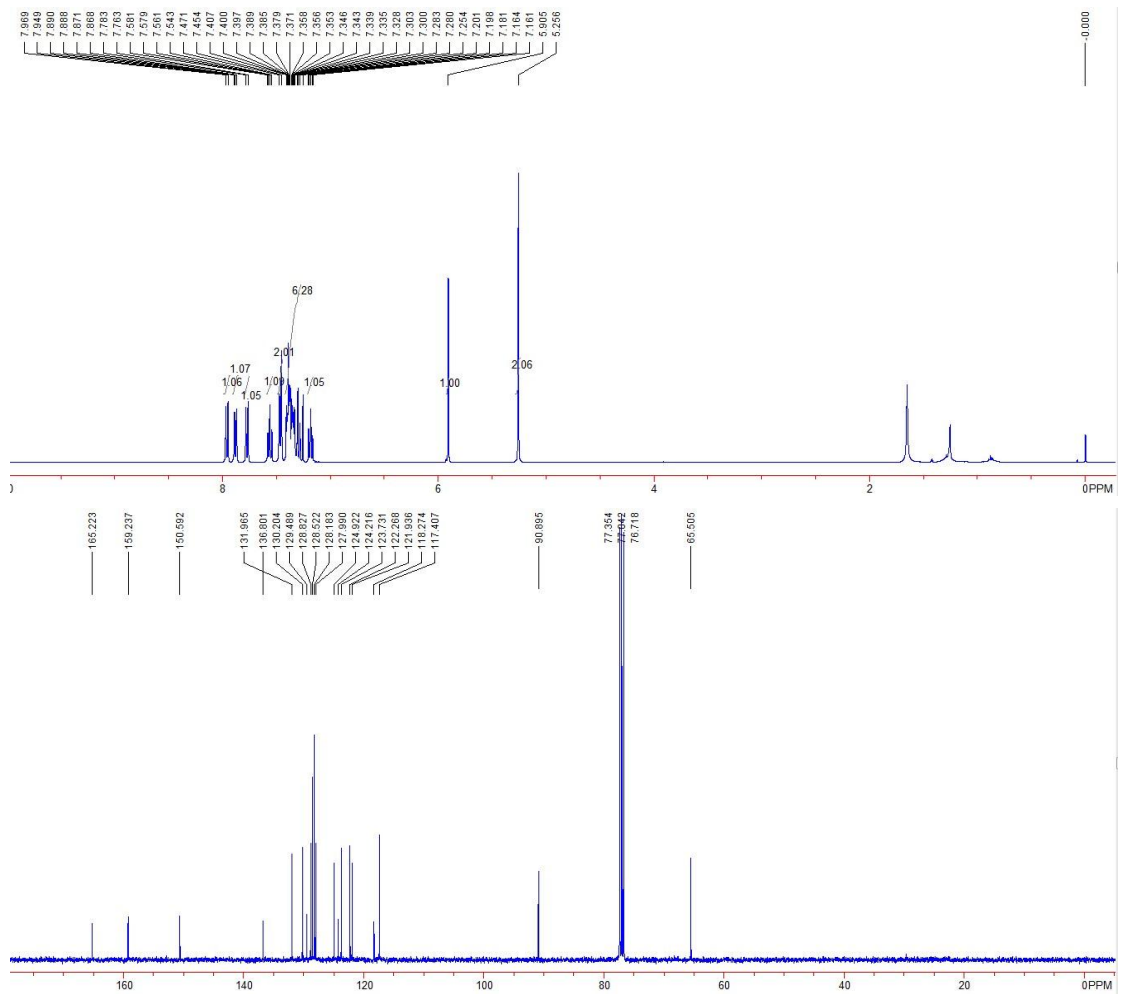

**7b:**

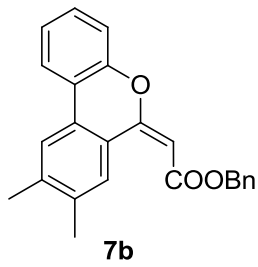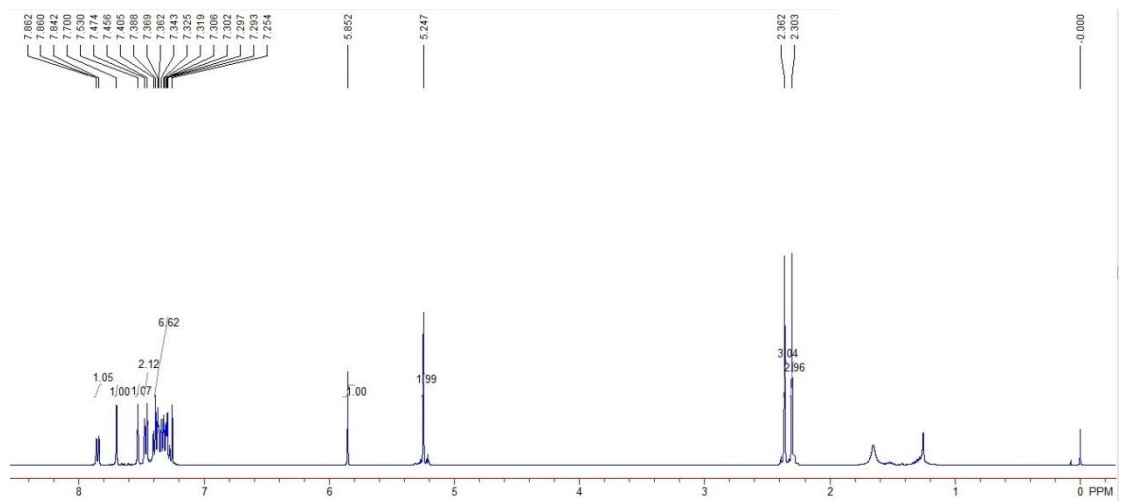



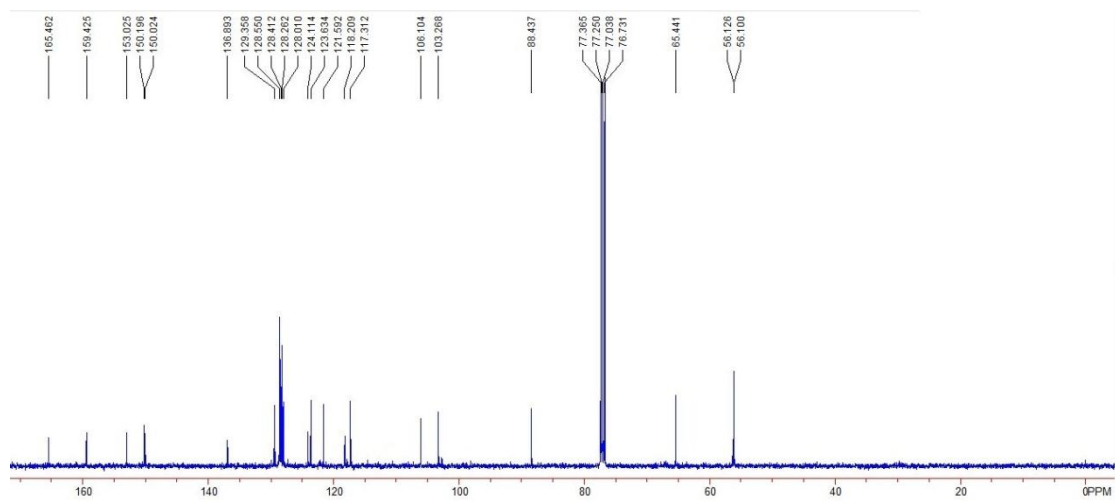

7d:

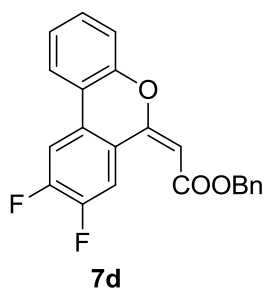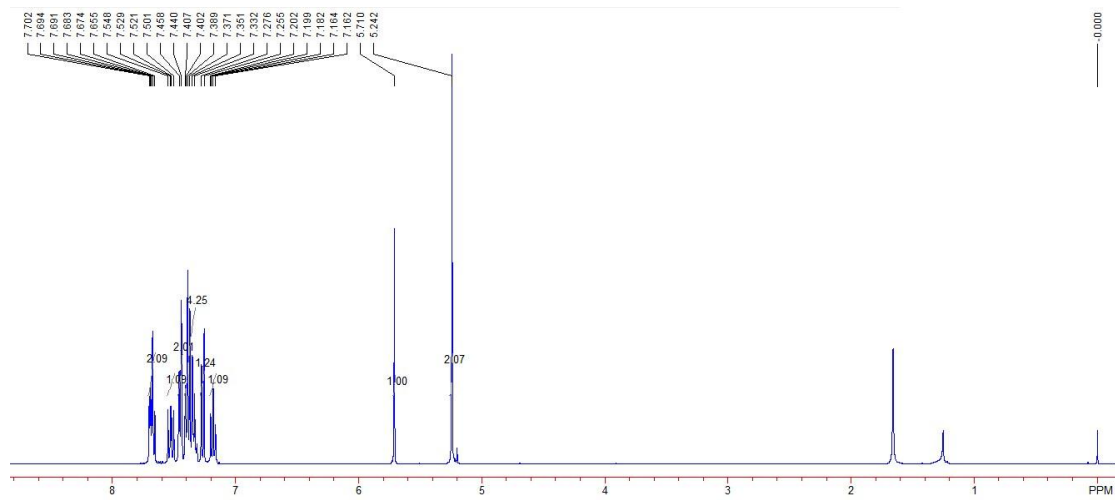

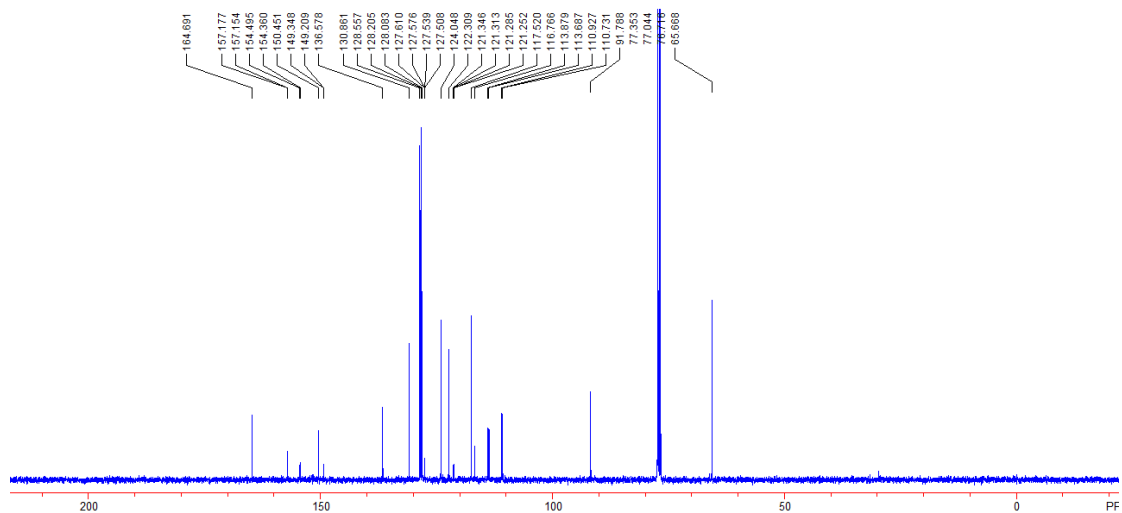

7e:

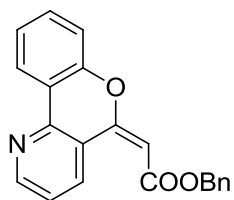

7e

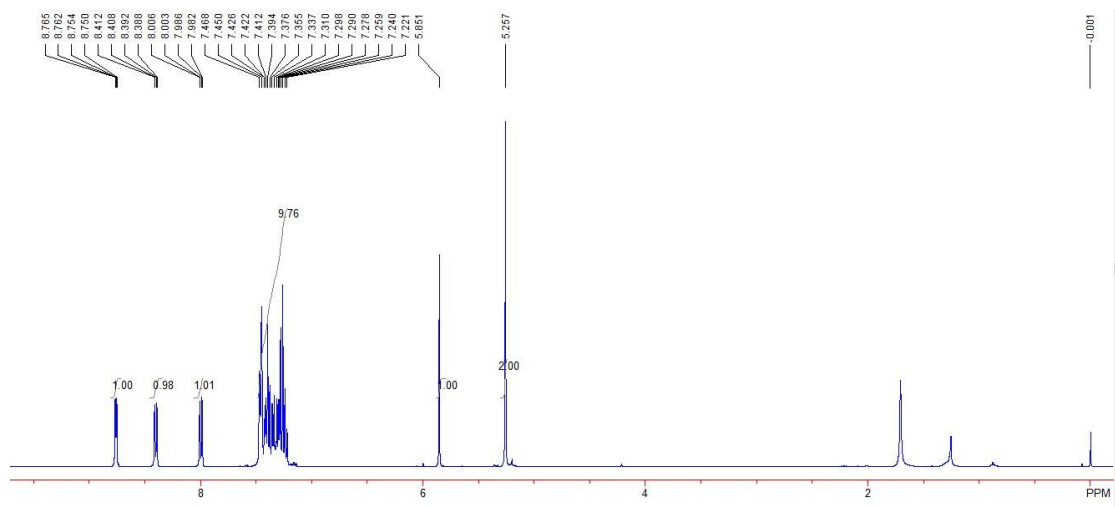

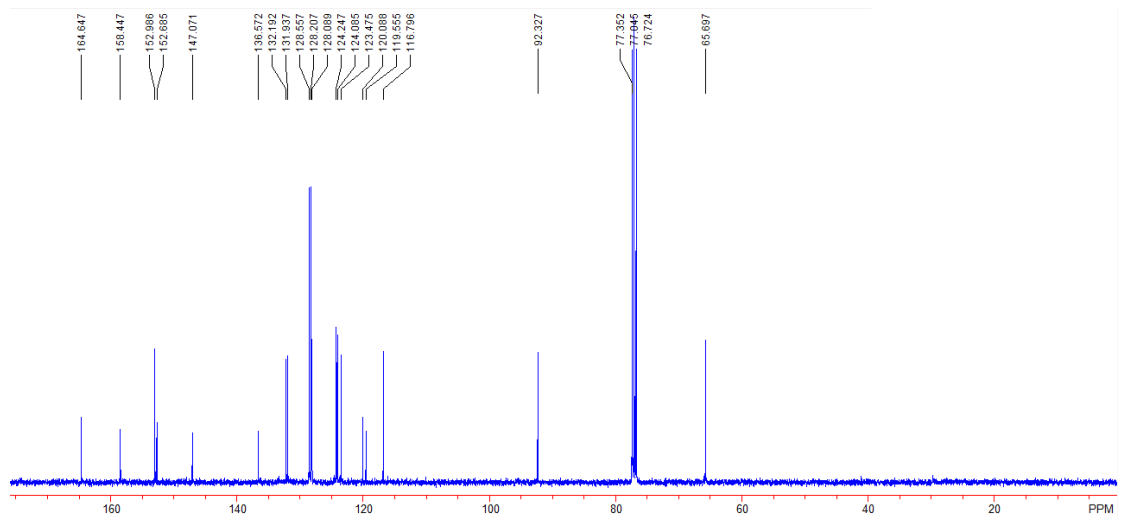

**8a:**

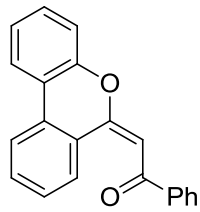

**8a**

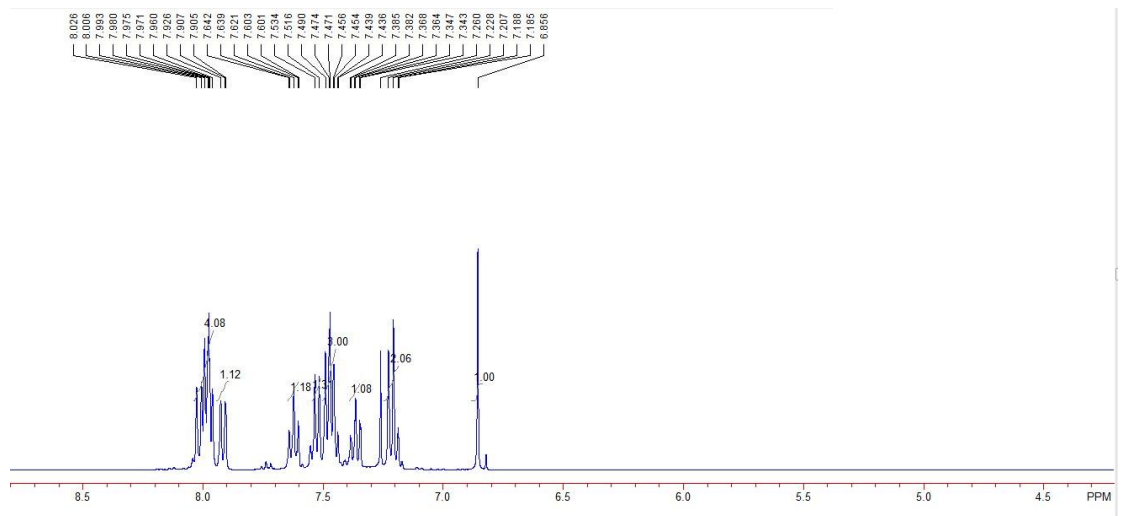

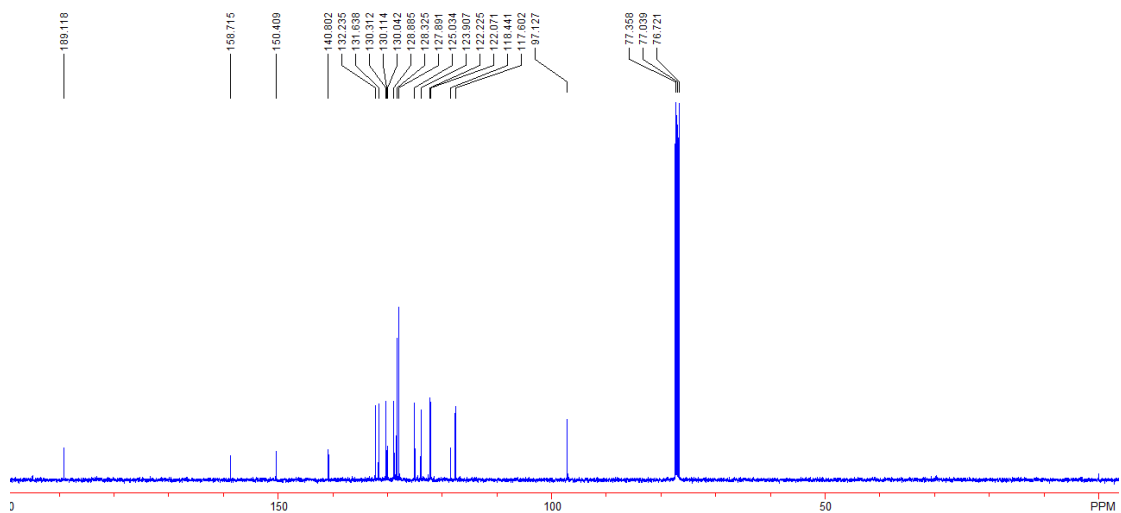

**8b:**

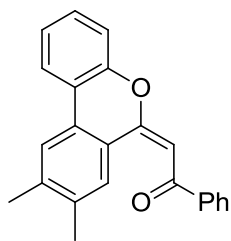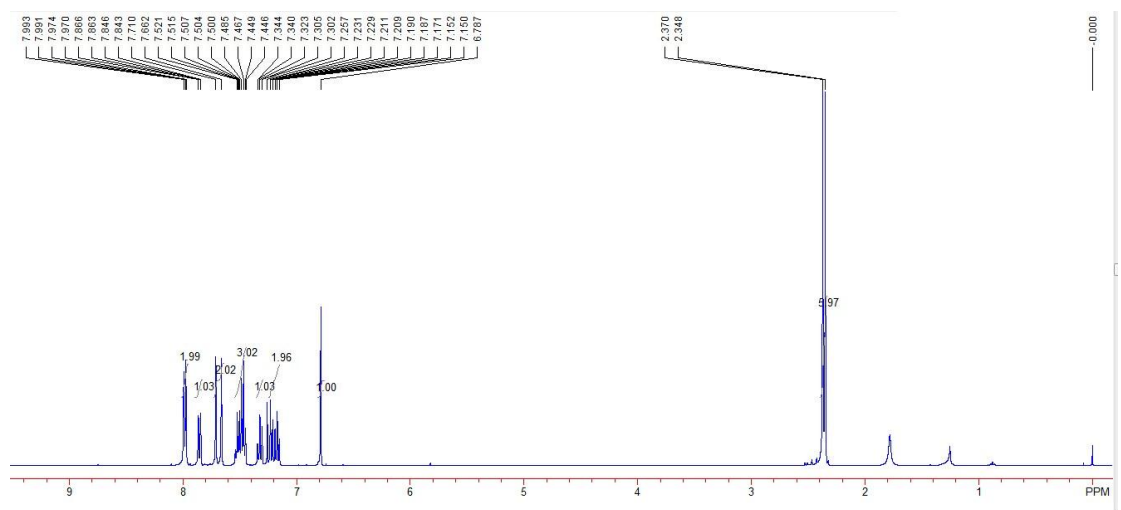

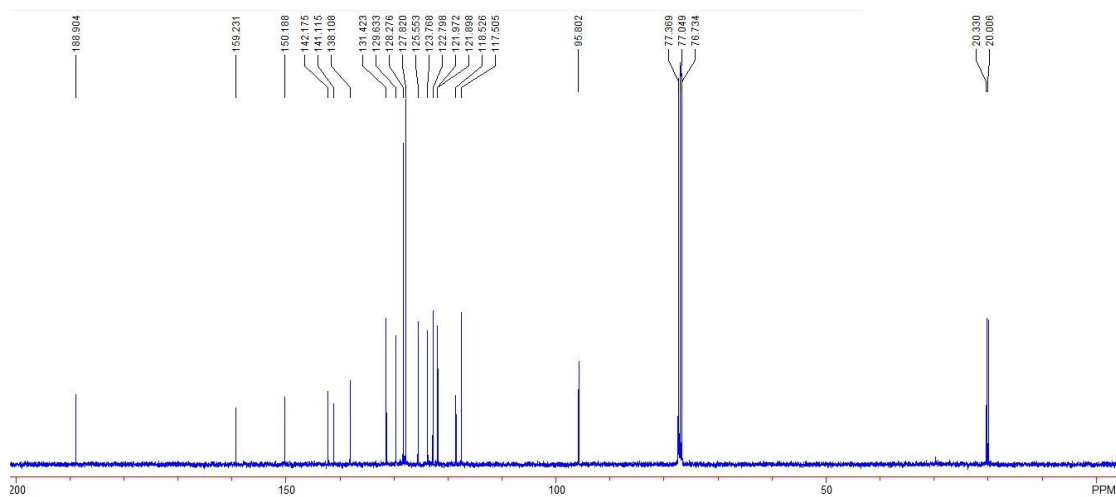

5. NOE spectrum of 4a:

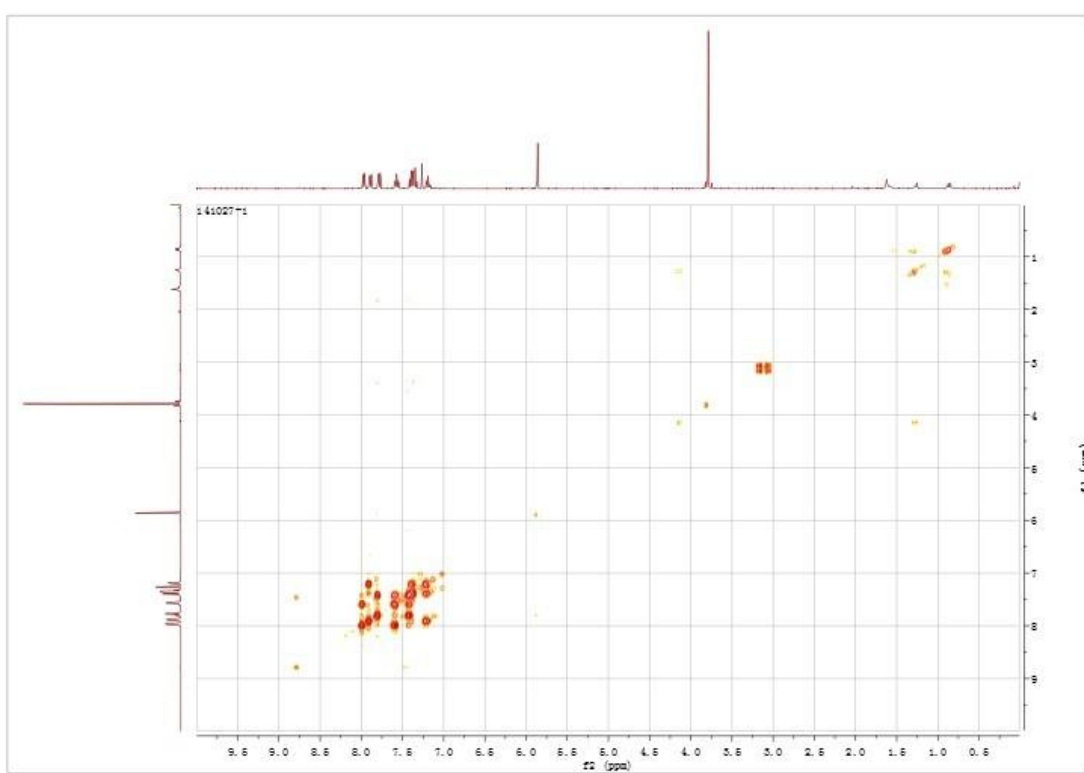

Supplement: c5ra10550a1.pdf [file c5ra10550a1.pdf]
